# Supplementary material for: Ketamine Normalizes the Structural Alterations of Inferior Frontal Gyrus in Depression
Source: PubMed Central journal article supplement — Chronic Stress (Thousand Oaks). 2020 Dec 22;4:2470547020980681. doi: 10.1177/2470547020980681 (PMC7758564; doi:10.1177/2470547020980681), 2020-12-22
Supplement: sj-pdf-1-css-10.1177_2470547020980681.pdf [file sj-pdf-1-css-10.1177_2470547020980681.pdf]

Supplementary to:

**Ketamine normalizes the structural alterations of inferior frontal gyrus in depression**

Supplementary table 1. Overview of significant results of comparison between pre and post-ketamine administration in the All MDD (including MDD/PTSD) group. T-tests,  $p < 0.001$ , FWE corrected.

| Regions                                                                                                                   | Size(voxels) | Peak MNI |     |    | Peak t-score | Volume difference          |
|---------------------------------------------------------------------------------------------------------------------------|--------------|----------|-----|----|--------------|----------------------------|
|                                                                                                                           |              | x        | y   | z  |              |                            |
| Precentral_R,<br>Postcentral_R                                                                                            | 1763         | 42       | -25 | 61 | -9143.2      | T-test pre > post-infusion |
| Left cerebrum,<br>Angular_L,<br>Parietal_Inf_L,<br>Cingulum_Mid_L,<br>Occipital_Mid_L,<br>SupraMarginal_L,<br>Precuneus_L | 6347         | -38      | -51 | 33 | 4801.7       | T-test pre < post-infusion |

Supplementary table 2. Overview of significant results of comparison between pre and post-ketamine administration in the MDD group. T-tests,  $p < 0.001$ , FWE corrected.

| Regions                                                                       | Size(voxels) | Peak MNI |     |     | Peak t-score | Volume difference          |
|-------------------------------------------------------------------------------|--------------|----------|-----|-----|--------------|----------------------------|
|                                                                               |              | x        | y   | z   |              |                            |
| Pons, brainstem, midbrain                                                     | 3535         | 4        | -31 | -33 | -12721       | T-test pre > post-infusion |
| Postcentral_R, Rolandic_Oper_R, SupraMarginal_R, Insula_R, Frontal_Inf_Oper_R | 2846         | 35       | -14 | 25  | 6741.9       | T-test pre < post-infusion |

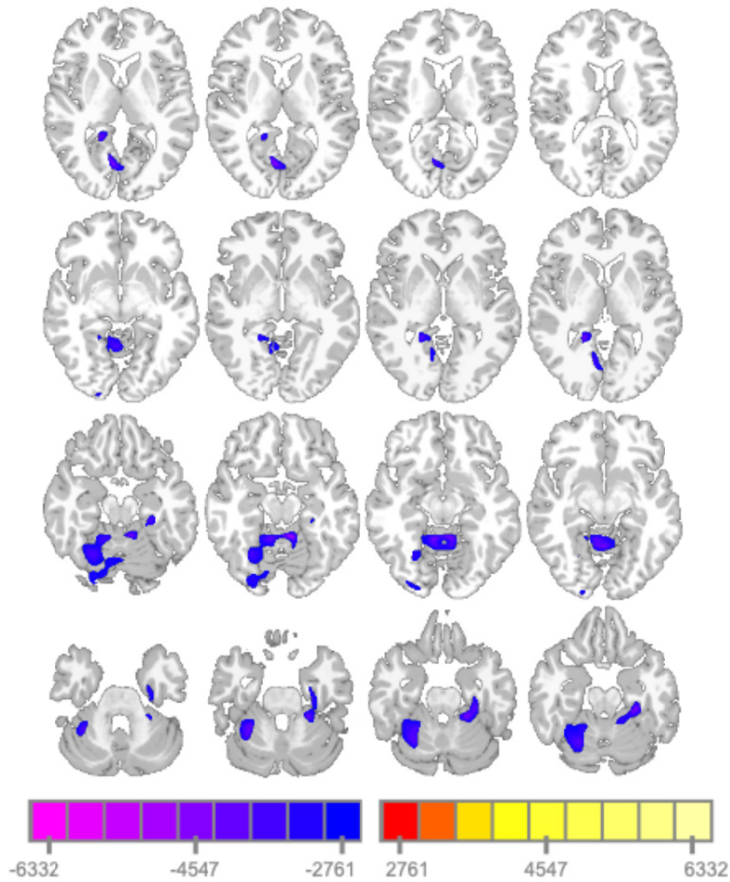

Supplementary figure 1. Results for the comparison of pre- and post-ketamine administration in the HC group.  $P < 0.01$ , FWE corrected. However, there is no significant volume change when  $p < 0.001$ . Color bar represents the t-score of Jacobian values. Voxels with decreased volume after ketamine administration were in cerebellum areas (peak MNI coordinate: -8, -47, -16); Voxels with increased volume were not found.
